# Supplementary material for: Hexagonal MoTe2 with Amorphous BN Passivation Layer for Improved Oxidation Resistance and Endurance of 2D Field Effect Transistors
Source: PubMed Central journal article supplement (PMC5989207; doi:10.1038/s41598-018-26751-4), 2018-06-06
Supplement: 41598_2018_26751_MOESM1_ESM.pdf [file 41598_2018_26751_MOESM1_ESM.pdf]

# Hexagonal MoTe<sub>2</sub> with Amorphous BN Passivation Layer for Improved Oxidation Resistance and Endurance of 2D Field Effect Transistors

Benjamin Sirota<sup>1</sup>, Nicholas Glavin<sup>2</sup>, Sergiy Krylyuk<sup>3,4</sup>, Albert V. Davydov<sup>4</sup> and Andrey A. Voevodin<sup>1\*</sup>

<sup>1</sup>Materials Science and Engineering, Advanced Materials and Manufacturing Processing Institute, University of North Texas, Denton, TX 76203, USA

<sup>2</sup>Materials and Manufacturing Directorate, Air Force Research Laboratory, Wright-Patterson AFB, OH 45433, USA

<sup>3</sup>Theiss Research, Inc., La Jolla, CA 92037, USA.

<sup>4</sup> Materials Science and Engineering Division, National Institute of Standards and Technology, Gaithersburg, MD 20899, USA

\* Correspondence to Andrey.Voevodin@unt.edu

Supplementary Information:

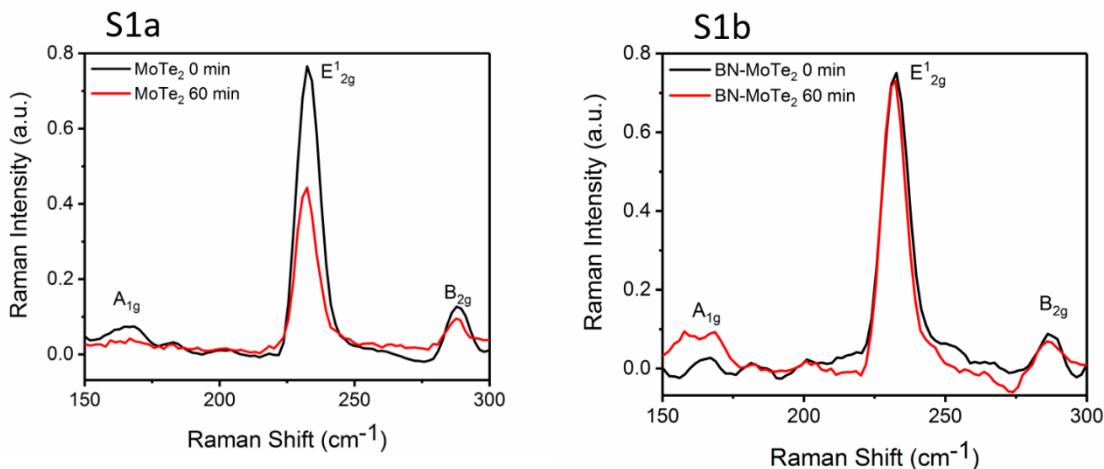

Supplementary Figure 1. Raman spectra of uncapped and BN-capped MoTe<sub>2</sub> before and after 60 min of heating at 100 °C. Data was normalized to the substrate's Si 520.5 cm<sup>-1</sup> peak (not shown).

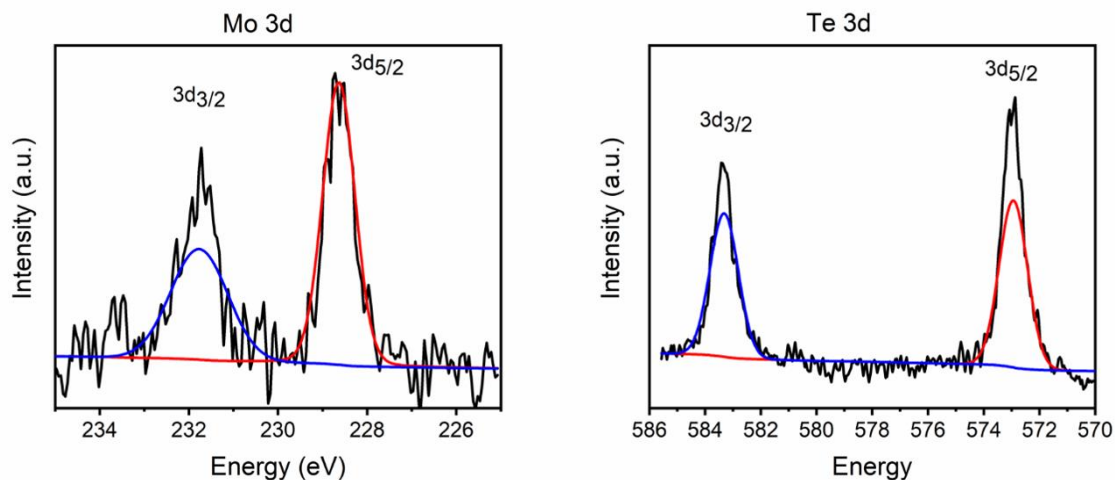

Supplementary Figure 2. XPS spectra of freshly exfoliated MoTe<sub>2</sub> flake. Mo binding energies at 228.64 eV and 231.77 eV correspond to 3d<sub>5/2</sub> and 3d<sub>3/2</sub> Mo orbitals, respectively. Te binding energies at 572.93 eV and 583.31 eV correspond to 3d<sub>5/2</sub> and 3d<sub>3/2</sub> Te orbitals, respectively. This is in good agreement with Te-Mo bonding.

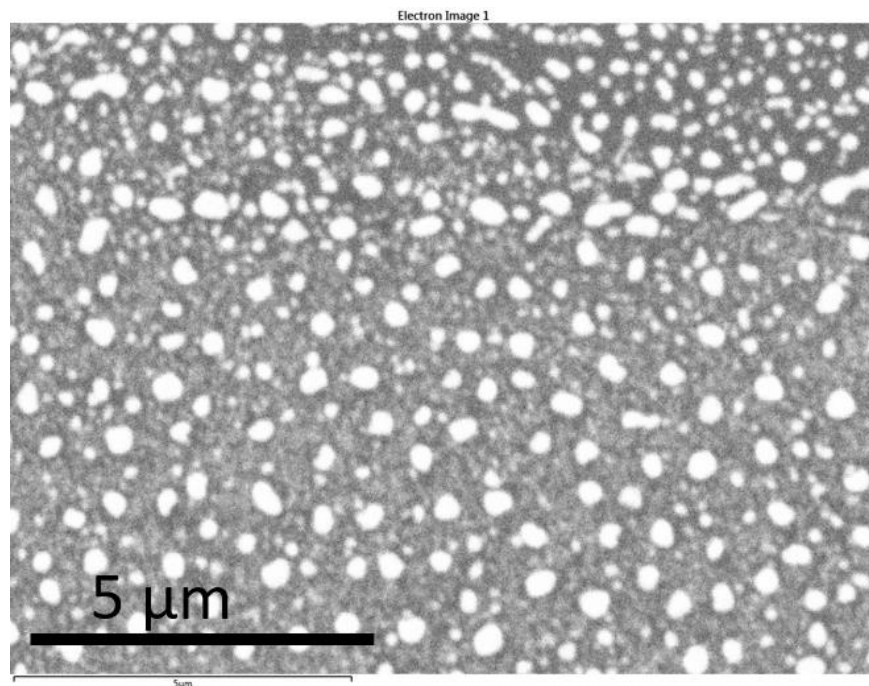

Au dewetting from 300 C heating

Supplementary Figure 3. SEM image of Ti/Au film after heating at 300 °C showing the formation of droplets due to dewetting.
